# Supplementary material for: Beryllium derivatives of a phenyl-substituted β-diketiminate: a well-defined ring opening reaction of tetrahydrofuran
Source: Royal Society of Chemistry journal article supplement (doi:10.1039/c3dt51021b), 2013-01-01

Supplementary Information for

**Beryllium Derivatives of a Phenyl-substituted  $\beta$ -diketiminato: a Well-Defined Ring Opening Reaction of Tetrahydrofuran**

Merle Arrowsmith, Mark R. Crimmin, Michael S. Hill\* and Gabriele Kociok-Köhn

### NMR spectra for compound 2

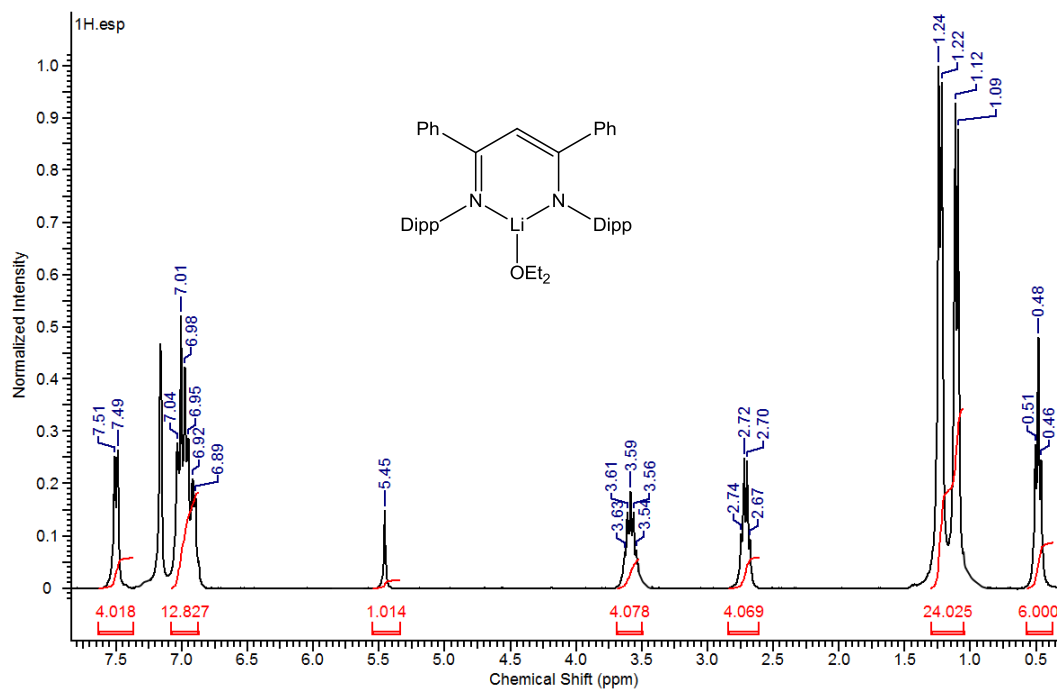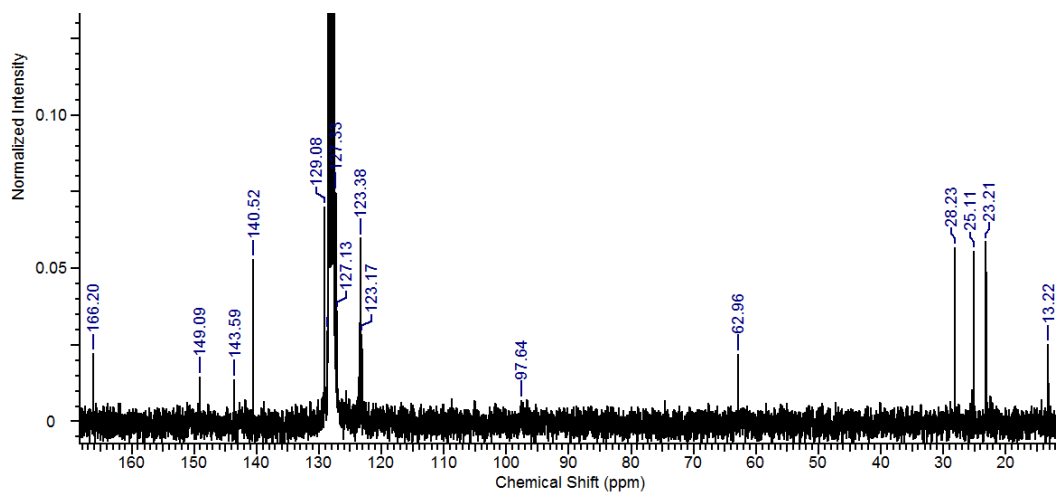

Supplement: c3dt51021b.pdf [file c3dt51021b.pdf]
